# Supplementary material
Source: Springer Nature journal article supplement (https://www.springermedizin.de/resource/supplementary/13098_2010_109_MOESM1_ESM.pdf/9670596)
Supplement: MOESM1 [file 9670596]

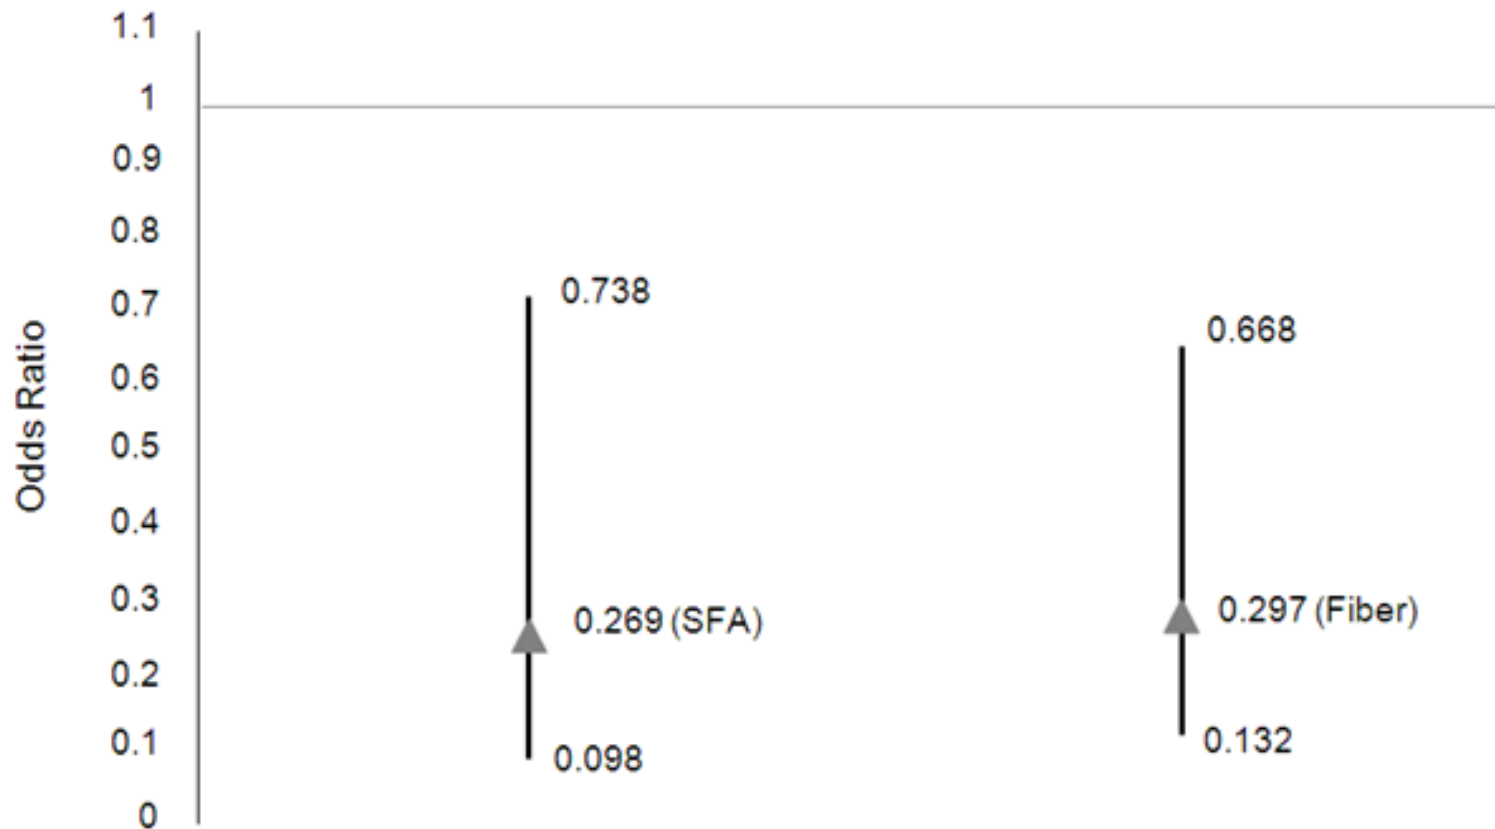

Figure 1. Odds ratio for CAD risk according to recommended intake of saturated fat (SFA <10% TCV) and dietary fibers (>20g/day), adjusted for TCV and BMI (CI 95%;  $p < 0.05$ ).
